# Supplementary material for: Fuel cell-powered microfluidic platform for lab-on-a-chip applications
Source: Royal Society of Chemistry journal article supplement (doi:10.1039/c1lc20426b), 2011-11-10
Supplement: c1lc20426b_2.pdf [file c1lc20426b_2.pdf]

## Electronic Supplementary Information

### Paper title:

Fuel cell-powered microfluidic platform for Lab-on-a-Chip applications

by J.P. Esquivel, M.Castellarnau, T. Senn, B. Löchel , J. Samitier and N. Sabaté.

### File name:

FC-powered microfluidic platform.mov

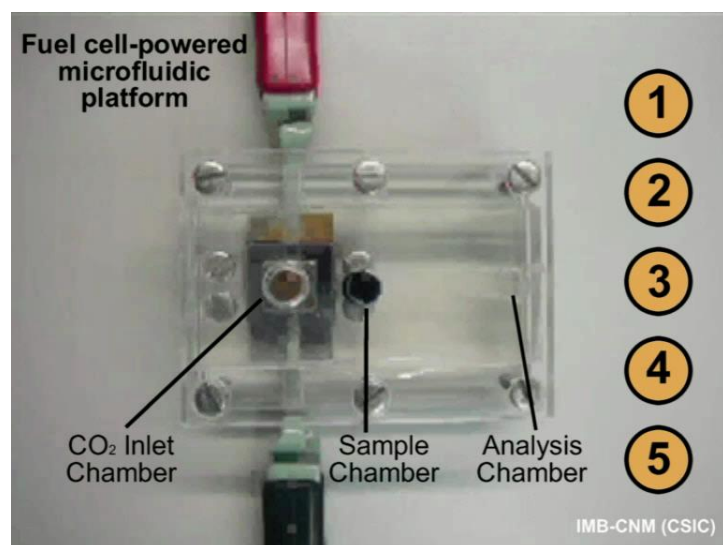

### Description:

A micro direct methanol fuel cell delivers electrical and hydraulic power to a microfluidic platform. The video shows the operation of the platform when the fuel cell is operated at 20 mA. The times shown in the right side correspond to the points in Figure 4, described in the manuscript.

### Keywords:

Micro Fuel Cell

Microfluidics

Autonomous Lab-on-a-Chip
